# Supplementary material
Source: Springer Nature journal article supplement (https://hal.science/hal-01341276v1/file/12711_2013_2660_MOESM3_ESM.pdf)
Supplement: MOESM3 [file 12711_2013_2660_MOESM3_ESM.pdf]

### Additional file 3

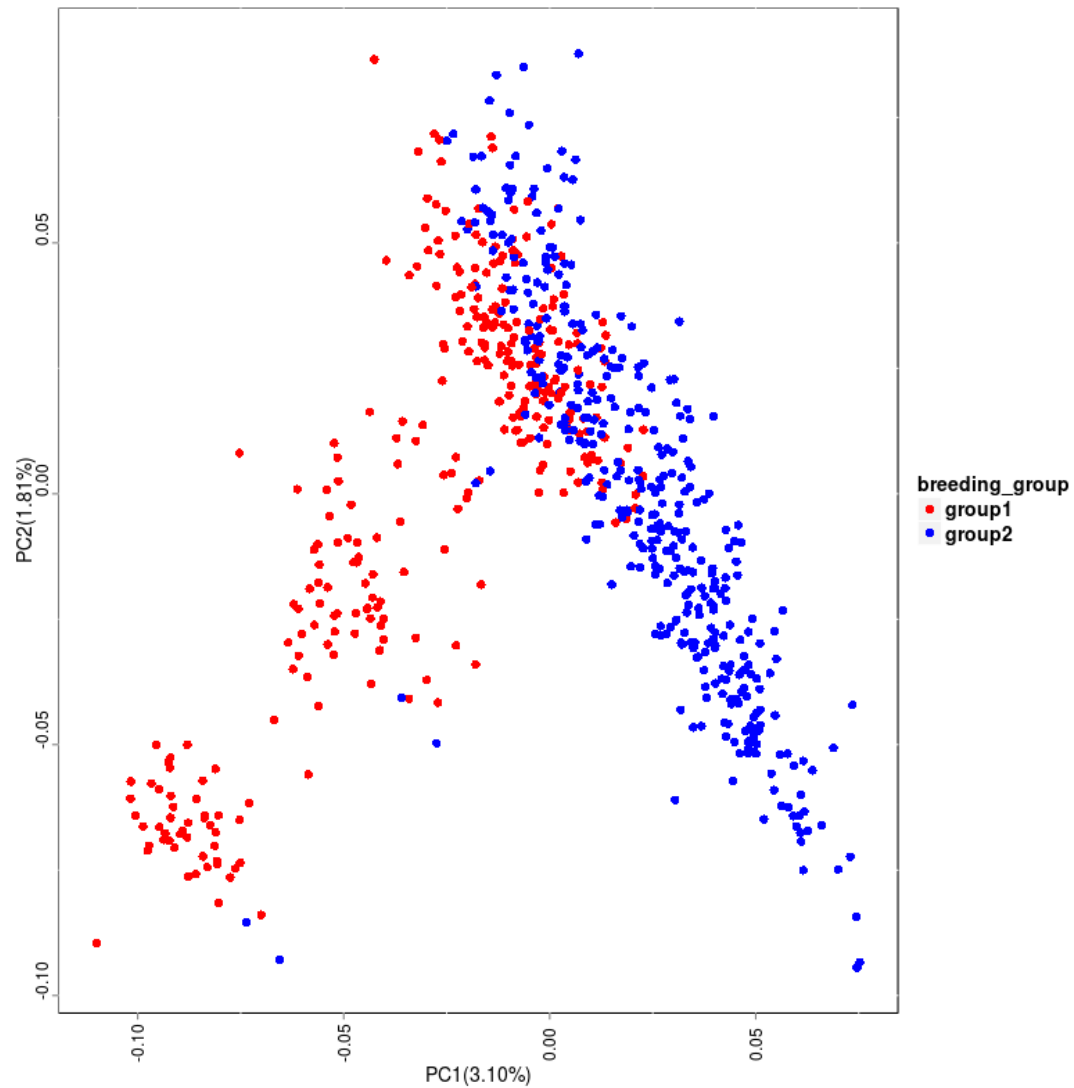

**Principal component analysis of the genomic relationships among the genotyped bulls.**

Breeding groups (blue and red dots) represent the grouping of genotyped animals based on a priori information related to two different artificial selection criteria applied in this *Bos indicus* (Nellore) population in the past 20 years.
